# Supplementary material for: Redox-dependent regulation of mitochondrial dynamics by DJ-1 paralogs in Saccharomyces cerevisiae
Source: PubMed Central journal article supplement — Redox Biol. 2020 Feb 7;32:101451. doi: 10.1016/j.redox.2020.101451 (PMC7026286; doi:10.1016/j.redox.2020.101451), 2020-02-07
Supplement: mmc1.pdf [file mmc1.pdf]

1 **Supporting Information.**

2 **Figure. S1**

3  
4  
5  
6  
7  
8  
9  
10  
11  
12  
13  
14  
15  
16  
17  
18  
19  
20  
21  
22  
23  
24  
25  
26

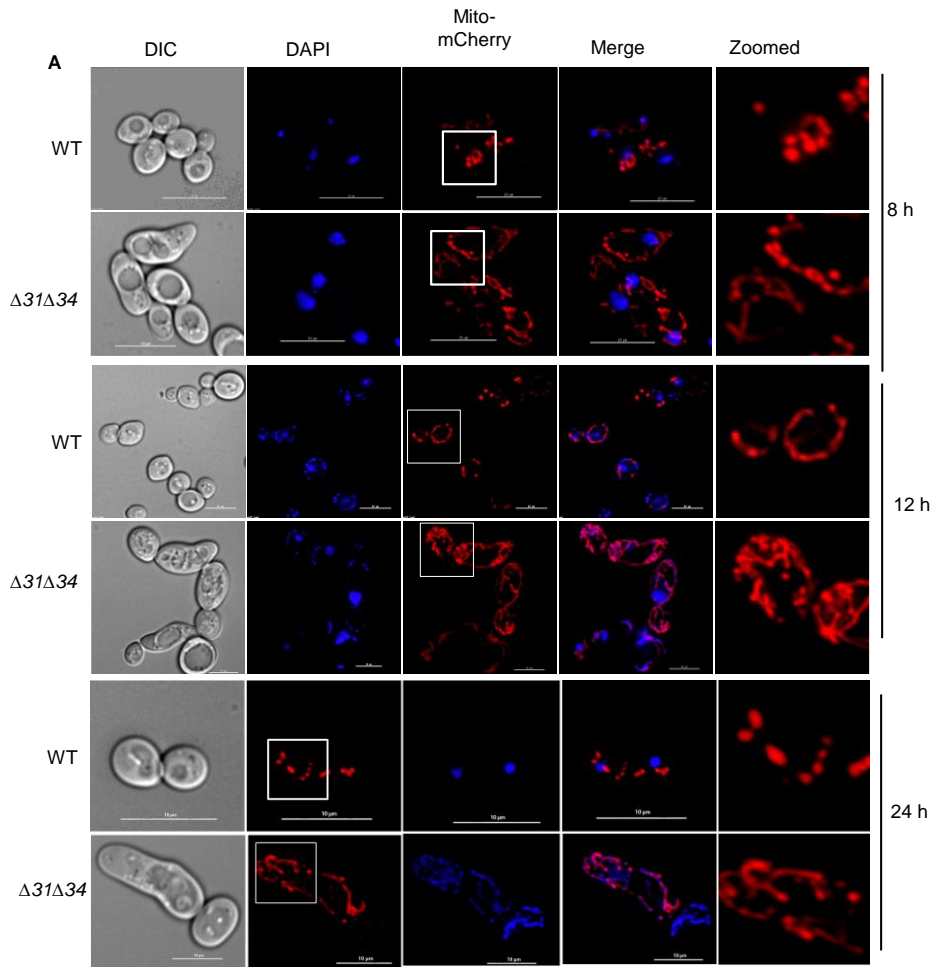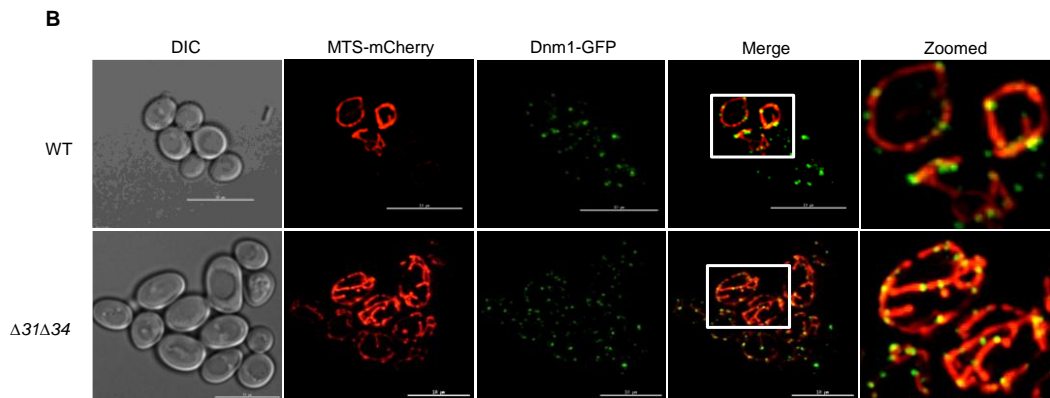

Figure. S2

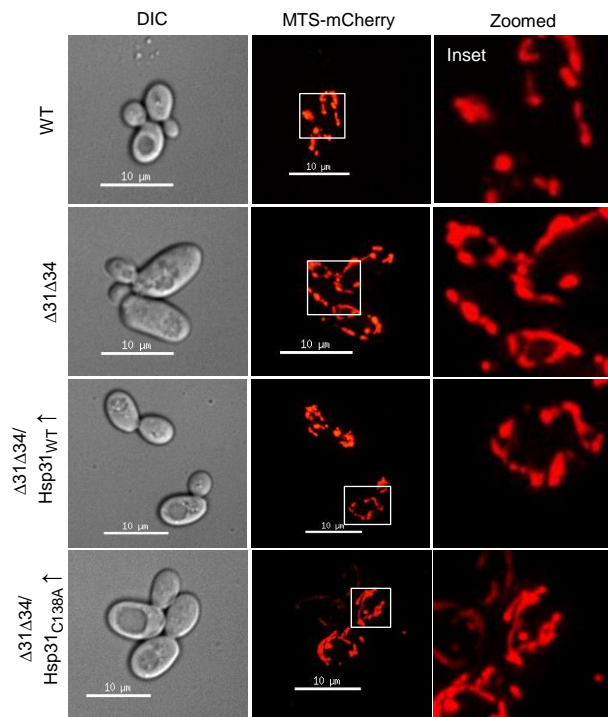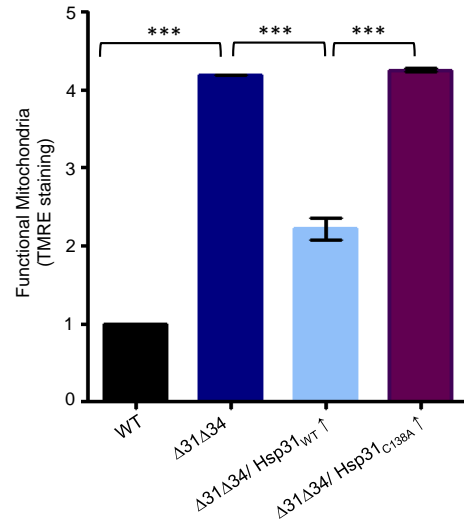

27  
28  
29  
30  
31  
32  
33  
34  
35  
36  
37

Figure. S3

A

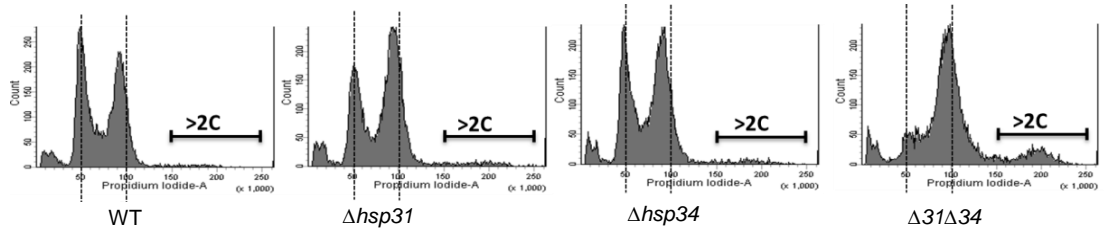

B

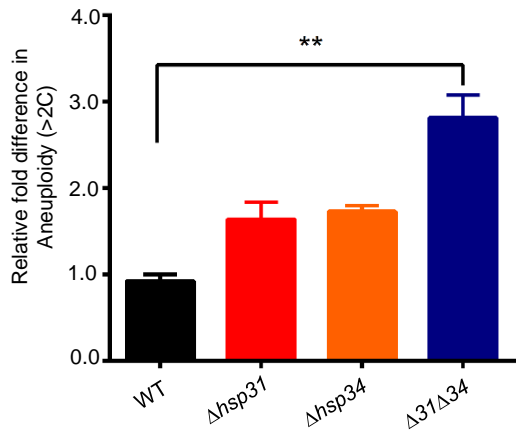

C

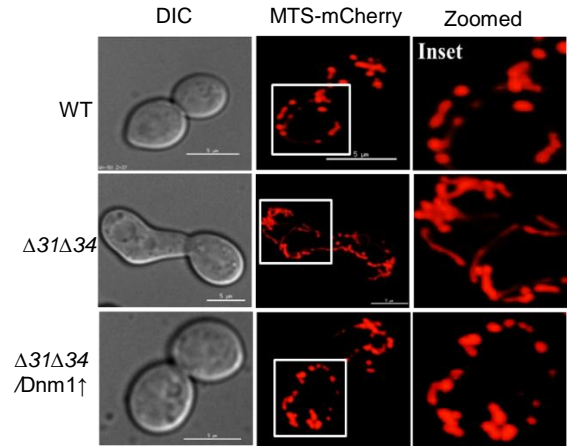

38

39

40

41

42

43

44

45

46

47

48

49

Figure. S4

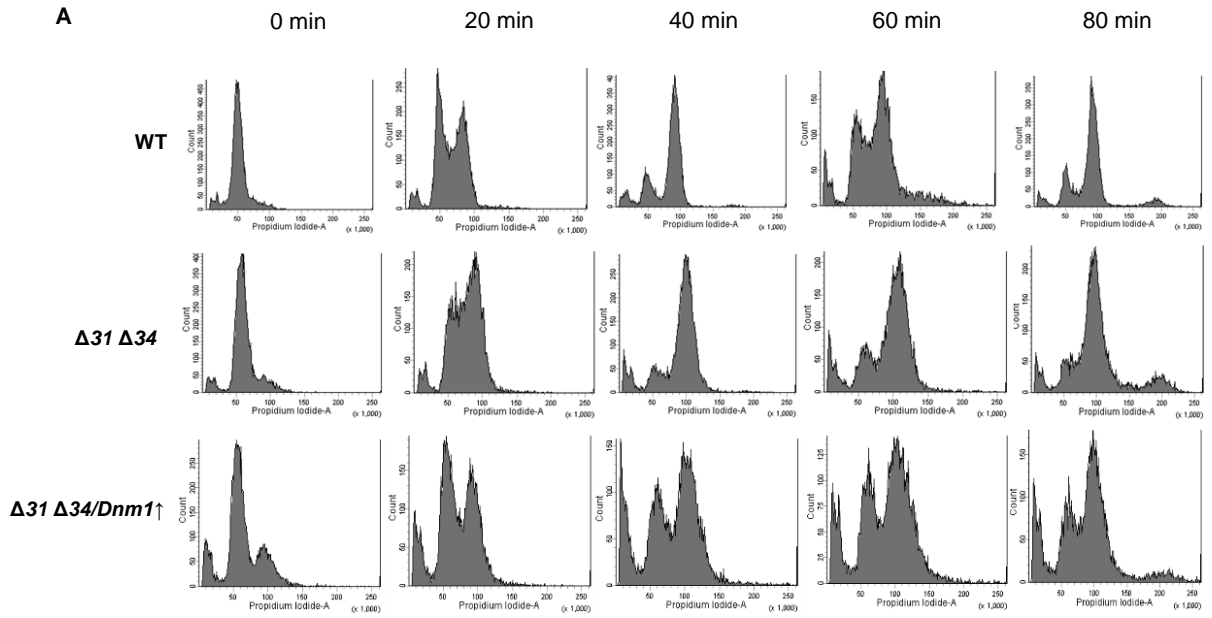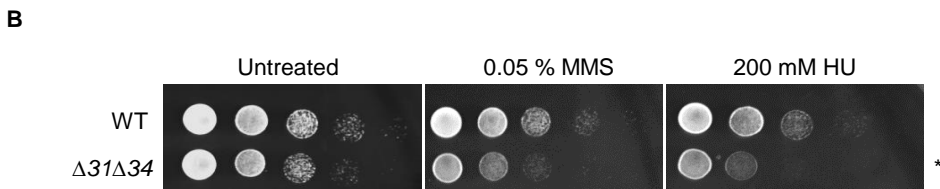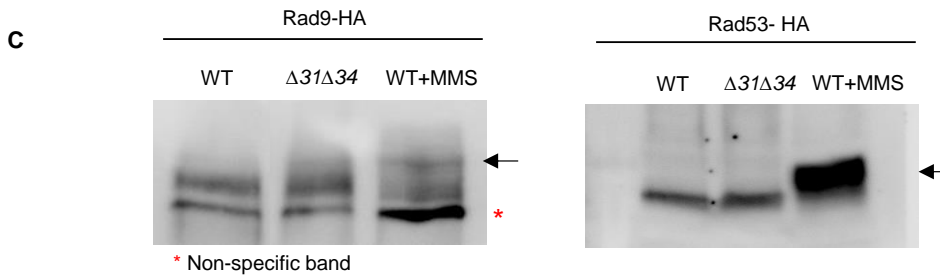

51

52

53

54

55

56

Figure. S5

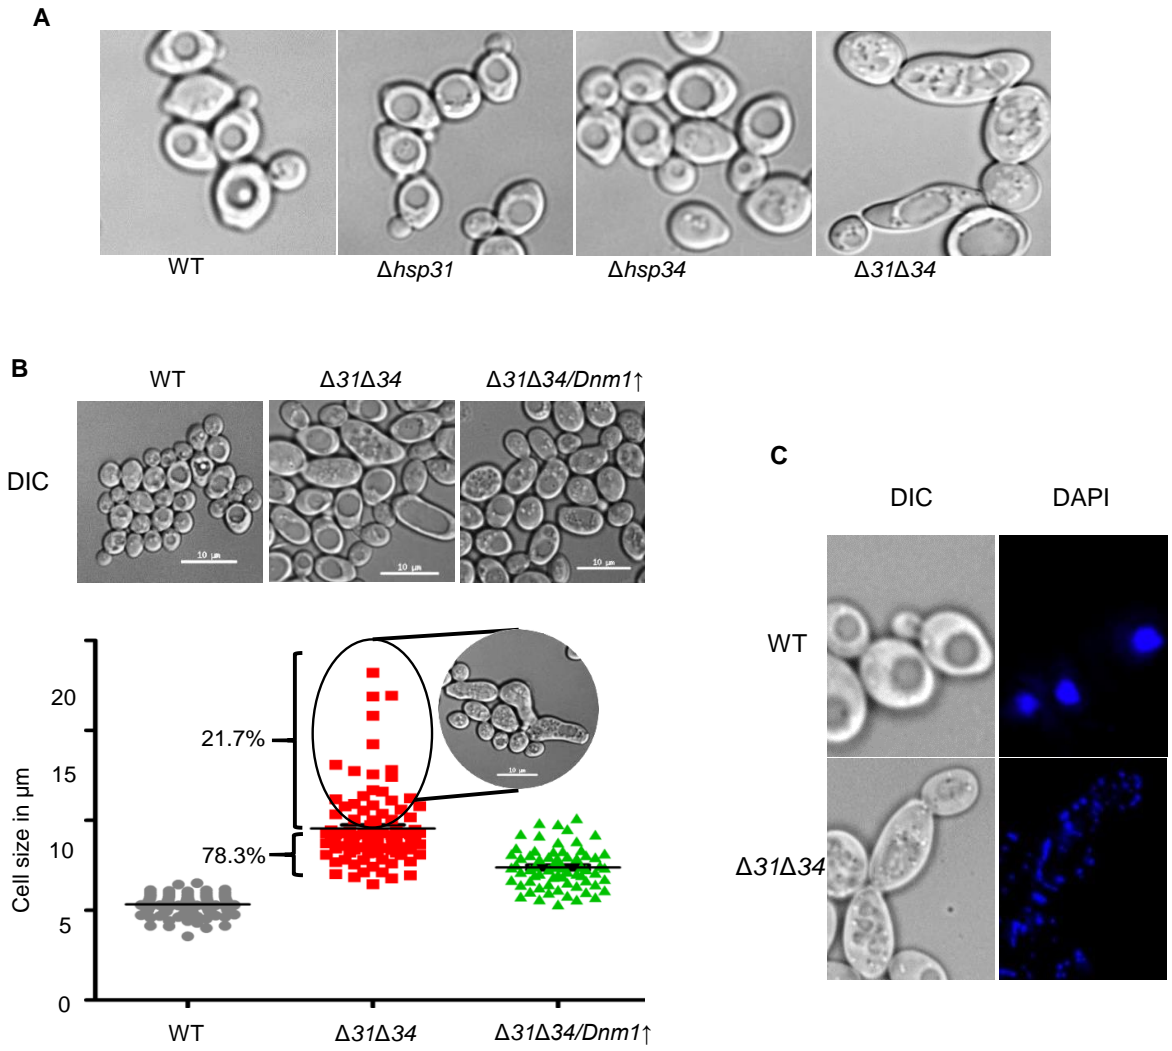

58

59

60

61

62

63

64

65

66 **Table.S1** List of yeast strains used in this study.

| <b>Strain</b>                   | <b>Genotype</b>                                                                         | <b>Source</b>              |
|---------------------------------|-----------------------------------------------------------------------------------------|----------------------------|
| BY4741 WT                       | <i>MATa his3Δ1 leu2Δ0 met15Δ0 ura3Δ0</i>                                                | Open Biosystems            |
| $\Delta hsp31$                  | <i>MATa his3Δ1 leu2Δ0 met15Δ0 ura3Δ0 Δhsp31::KanMX4</i>                                 | Bankapalli et al. 2015 [1] |
| $\Delta hsp32$                  | <i>MATa his3Δ1 leu2Δ0 met15Δ0 ura3Δ0 Δhsp32::hphNT1</i>                                 | Bankapalli et al. 2015     |
| $\Delta hsp33$                  | <i>MATa his3Δ1 leu2Δ0 met15Δ0 ura3Δ0 Δhsp33::hphNT1</i>                                 | Bankapalli et al. 2015     |
| $\Delta hsp34$                  | <i>MATa his3Δ1 leu2Δ0 met15Δ0 ura3Δ0 Δhsp34::URA3</i>                                   | Bankapalli et al. 2015     |
| $\Delta 31\Delta 32$            | <i>MATa his3Δ1 leu2Δ0 met15Δ0 ura3Δ0 Δhsp31::KanMX4; Δhsp32::hphNT1</i>                 | This study                 |
| $\Delta 31\Delta 33$            | <i>MATa his3Δ1 leu2Δ0 met15Δ0 ura3Δ0 Δhsp31::KanMX4; Δhsp33::hphNT1</i>                 | This study                 |
| $\Delta 31\Delta 34$            | <i>MATa his3Δ1 leu2Δ0 met15Δ0 ura3Δ0 Δhsp31::KanMX4; Δhsp34::URA3</i>                   | Bankapalli et al. 2015     |
| $\Delta 31\Delta 32\Delta 34$   | <i>MATa his3Δ1 leu2Δ0 met15Δ0 ura3Δ0 Δhsp31::KanMX4; Δhsp32::hphNT1; Δhsp34::URA3</i>   | This study                 |
| $\Delta 31\Delta 33\Delta 34$   | <i>MATa his3Δ1 leu2Δ0 met15Δ0 ura3Δ0 Δhsp31::KanMX4; Δhsp33::hphNT1; Δhsp34::URA3</i>   | This study                 |
| $\Delta atg32$                  | <i>MATa his3Δ1 leu2Δ0 met15Δ0 ura3Δ0 Δatg32::HIS3</i>                                   | This study                 |
| WT-Om45-GFP                     | <i>MATa his3Δ1 leu2Δ0 met15Δ0 ura3Δ0 OM45-GFP::hphNT1</i>                               | This study                 |
| $\Delta hsp31$ -Om45-GFP        | <i>MATa his3Δ1 leu2Δ0 met15Δ0 ura3Δ0 Δhsp31::KanMX4; OM45-GFP::hphNT1</i>               | This study                 |
| $\Delta hsp34$ -Om45-GFP        | <i>MATa his3Δ1 leu2Δ0 met15Δ0 ura3Δ0 Δhsp34::URA3; OM45-GFP::hphNT1</i>                 | This study                 |
| $\Delta 31\Delta 34$ -Om45-GFP  | <i>MATa his3Δ1 leu2Δ0 met15Δ0 ura3Δ0 Δhsp31::KanMX4; Δhsp34::URA3; OM45-GFP::hphNT1</i> | This study                 |
| $\Delta atg32$ -Om45-GFP        | <i>MATa his3Δ1 leu2Δ0 met15Δ0 ura3Δ0 Δatg32::HIS3; OM45-GFP::hphNT1</i>                 | This study                 |
| $\Delta bar1$                   | <i>MATa his3Δ1 leu2Δ0 met15Δ0 ura3Δ0 Δbar1::LEU2</i>                                    | This study                 |
| $\Delta hsp31\Delta bar1$       | <i>MATa his3Δ1 leu2Δ0 met15Δ0 ura3Δ0 Δhsp31::KanMX4; Δbar1::LEU2</i>                    | This study                 |
| $\Delta hsp34\Delta bar1$       | <i>MATa his3Δ1 leu2Δ0 met15Δ0 ura3Δ0 Δhsp34::URA3; Δbar1::LEU2</i>                      | This study                 |
| $\Delta 31\Delta 34\Delta bar1$ | <i>MATa his3Δ1 leu2Δ0 met15Δ0 ura3Δ0 Δhsp31::KanMX4; Δhsp34::URA3; Δbar1::LEU2</i>      | This study                 |
| WT/Dnm1-HA                      | <i>MATa his3Δ1 leu2Δ0 met15Δ0 ura3Δ0 DNM1-HA::KanMX4</i>                                | This study                 |
| WT/Fzo1-HA                      | <i>MATa his3Δ1 leu2Δ0 met15Δ0 ura3Δ0 FZO1-HA::KanMX4</i>                                | This study                 |
| WT/Mgm1-HA                      | <i>MATa his3Δ1 leu2Δ0 met15Δ0 ura3Δ0 MGM1-HA::KanMX4</i>                                | This study                 |

|                                 |                                                                                                                                                                                                      |            |
|---------------------------------|------------------------------------------------------------------------------------------------------------------------------------------------------------------------------------------------------|------------|
| $\Delta 31\Delta 34$ /Dnm1-HA   | <i>MATa his3<math>\Delta</math>1 leu2<math>\Delta</math>0 met15<math>\Delta</math>0 ura3<math>\Delta</math>0 <math>\Delta</math>hsp31::KanMX4; <math>\Delta</math>hsp34::URA3; DNM1::hphNT1</i>      | This study |
| $\Delta 31\Delta 34$ /Fzo1-HA   | <i>MATa his3<math>\Delta</math>1 leu2<math>\Delta</math>0 met15<math>\Delta</math>0 ura3<math>\Delta</math>0 <math>\Delta</math>hsp31::KanMX4; <math>\Delta</math>hsp34::URA3; FZO1::hphNT1</i>      | This study |
| $\Delta 31\Delta 34$ /Mgm1-HA   | <i>MATa his3<math>\Delta</math>1 leu2<math>\Delta</math>0 met15<math>\Delta</math>0 ura3<math>\Delta</math>0 <math>\Delta</math>hsp31::KanMX4; <math>\Delta</math>hsp34::URA3; MGM1::hphNT1</i>      | This study |
| WT/Dnm1-GFP                     | <i>MATa his3<math>\Delta</math>1 leu2<math>\Delta</math>0 met15<math>\Delta</math>0 ura3<math>\Delta</math>0 DNM1-GFP::hphNT1</i>                                                                    | This study |
| $\Delta 31\Delta 34$ /Dnm1-GFP  | <i>MATa his3<math>\Delta</math>1 leu2<math>\Delta</math>0 met15<math>\Delta</math>0 ura3<math>\Delta</math>0 <math>\Delta</math>hsp31::KanMX4; <math>\Delta</math>hsp34::URA3; DNM1-GFP::hphNT1</i>  | This study |
| WT/Nup49-GFP                    | <i>MATa his3<math>\Delta</math>1 leu2<math>\Delta</math>0 met15<math>\Delta</math>0 ura3<math>\Delta</math>0 NUP49-GFP::hphNT1</i>                                                                   | This study |
| $\Delta 31\Delta 34$ /Nup49-GFP | <i>MATa his3<math>\Delta</math>1 leu2<math>\Delta</math>0 met15<math>\Delta</math>0 ura3<math>\Delta</math>0 <math>\Delta</math>hsp31::KanMX4; <math>\Delta</math>hsp34::URA3; Nup49-GFP::hphNT1</i> | This study |

67  
68  
69  
70  
71

**Table S2.** List of primers used in this study.

| Primer name | 5' → 3'                                           | Comments                            |
|-------------|---------------------------------------------------|-------------------------------------|
| P1          | CTAGAACACTTTTCTCCTTCATTCAAAAAGAAAAGCTGGCCTTGCA    | Forward, Excision of Hsp32 or Hsp33 |
| P2          | CAAGCCAAAAAAGAAAAAAGGAAAAAAGAAAACA<br>CAGC        | Reverse, Excision of Hsp32 or Hsp33 |
| P3          | ATGATAAGGGTGATGGTAAATTCTGGAGCTCGAAAAAGGAC         | Forward, Om45 GFP tagging           |
| P4          | TTATGCGGGAACCAACCCTTTACAATTAGCTATCTAACTA          | Reverse, Om45 GFP tagging           |
| P5          | ATGGCCCCAAAAAAGTTTTAC                             | Forward, Hsp31 cloning              |
| P6          | TTAGTTTTTTAAAGCGTCGATGGATCT                       | Reverse, Hsp31 cloning              |
| P7          | ATGACTCCAAAAAGAGCGCTAATA                          | Forward, Hsp34 cloning              |
| P8          | TCAGCTATATAATGCGTTTATAGC                          | Reverse, Hsp34 cloning              |
| P9          | CGGAGTTTATAAAAAGGCTGCAACCCTTATTAGTAATATTC<br>TG   | Forward, Dnm1-HA and GFP tagging    |
| P10         | CGCAATGTTGAAGTAAGATCAAAAATGAGATGAATTATGCA<br>ATTA | Reverse, Dnm1-HA and GFP tagging    |
| P11         | GTGGCTCAAAAATTGATGGTGAAGAAATAAATTTAGACAT<br>CGAT  | Forward, Fzo1-HA tagging            |

|     |                                                      |                            |
|-----|------------------------------------------------------|----------------------------|
| P12 | GTATATTGATTTGAAAAGACCTCATATATTTACAAGAATATCTA         | Reverse, Fzo1-HA tagging   |
| P13 | CAATCTTGGTTTTCAAGAAAAGCTACAAGGGCGTCTCCAAA AATTTA     | Forward, Mgm1-HA tagging   |
| P14 | GTAAAAAATGCTATTTACAAATTCTCTAATGACACTATTTAT TTTACATCA | Reverse, Mgm1-HA tagging   |
| P15 | GTTACATCAAAAAACGAAAACACTGGCATCATTGAGCATA             | Forward, Nup49-GFP tagging |
| P16 | CTTGTTATACGCACTATATAAACTTTTCAGGGCGATTTACTCA          | Reverse, Nup49-GFP tagging |
| P17 | TGAATCGCTCGCAACAGGAT                                 | Forward, <i>DNM1</i> q-PCR |
| P18 | CTACGCCACCGTATCTAGCG                                 | Reverse, <i>DNM1</i> q-PCR |
| P19 | CGAGCCCAGTACGGCTTTTA                                 | Forward, <i>MGM1</i> q-PCR |
| P20 | TCCATGACCACCGTCTTGTG                                 | Reverse, <i>MGM1</i> q-PCR |
| P21 | AGAGGCTCGGGAAAATGACG                                 | Forward, <i>FZO1</i> q-PCR |
| P23 | TGTCGGGACATTACTTCGGC                                 | Reverse, <i>FZO1</i> q-PCR |
| P24 | AATAAGGATTGACAGATTGAGAG                              | Forward, q-PCR control     |
| P25 | TTATCGCAATTAAGCAGACAA                                | Reverse, q-PCR control     |
| P26 | AGTTGATGCTACTCCTGGTAGA                               | Forward, <i>COX2</i>       |
| P27 | TTTGCATGACCTGTCCCACA                                 | Reverse, <i>COX2</i>       |

72  
73

74 **Table S3.** List of plasmids used in this study.

75

| Plasmid Name              | Comments                                           |
|---------------------------|----------------------------------------------------|
| pRS 415 TEF- Hsp31        | For complementation analysis.                      |
| pRS 415 TEF- Hsp31(C138A) | For complementation analysis.                      |
| pRS 415 TEF- Hsp34        | For complementation analysis.                      |
| pRS 415 TEF- MTS-mCherry  | For the visualization of mitochondrial morphology. |
| pRS 413 TEF- Dnm1         | For expression in yeast strains.                   |

76  
77

## 78 References

79 1. Bankapalli K, Saladi S, Awadia SS, Goswami AV, Samaddar M, D'Silva P. Robust glyoxalase activity  
80 of Hsp31, a ThiJ/DJ-1/Pfpl family member protein, is critical for oxidative stress resistance in  
81 *Saccharomyces cerevisiae*. *J Biol Chem*. 2015;290(44):26491-507. Epub 2015/09/16. doi: M115.673624  
82 [pii] 10.1074/jbc.M115.673624. PubMed PMID: 26370081.
